# Supplementary material for: Persistent tracers of historic ice flow in glacial stratigraphy near Kamb Ice Stream, West Antarctica
Source: Copernicus journal article supplement (doi:10.5194/tc-12-2821-2018), 2018-09-04
Supplement: Supplementary file 1 [file tc-12-2821-2018-supplement.pdf]

Supplement of The Cryosphere, 12, 2821–2829, 2018  
<https://doi.org/10.5194/tc-12-2821-2018-supplement>  
© Author(s) 2018. This work is distributed under  
the Creative Commons Attribution 4.0 License.

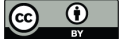

*Supplement of*

## **Persistent tracers of historic ice flow in glacial stratigraphy near Kamb Ice Stream, West Antarctica**

**Nicholas Holschuh et al.**

*Correspondence to:* Nicholas Holschuh (holschuh@uw.edu)

The copyright of individual parts of the supplement might differ from the CC BY 4.0 License.

# **Supporting Information: Persistent Tracers of Historic Ice Flow in Glacial Stratigraphy near Kamb Ice Stream, West Antarctica**

Nicholas Holschuh<sup>1</sup>, Knut Christianson<sup>1</sup>, Howard Conway<sup>1</sup>, Robert W. Jacobel<sup>2</sup>, Brian C. Welch<sup>2</sup>

<sup>1</sup>Department of Earth and Space Sciences, University of Washington, Johnson Hall Rm-070, Box 351310, 4000 15th Avenue NE, Seattle, Washington 98195-1310

<sup>2</sup>Department of Physics, St. Olaf College, 1520 St. Olaf Avenue, Northfield, MN 55057

*Correspondence to:* Nicholas Holschuh (holschuh@uw.edu)

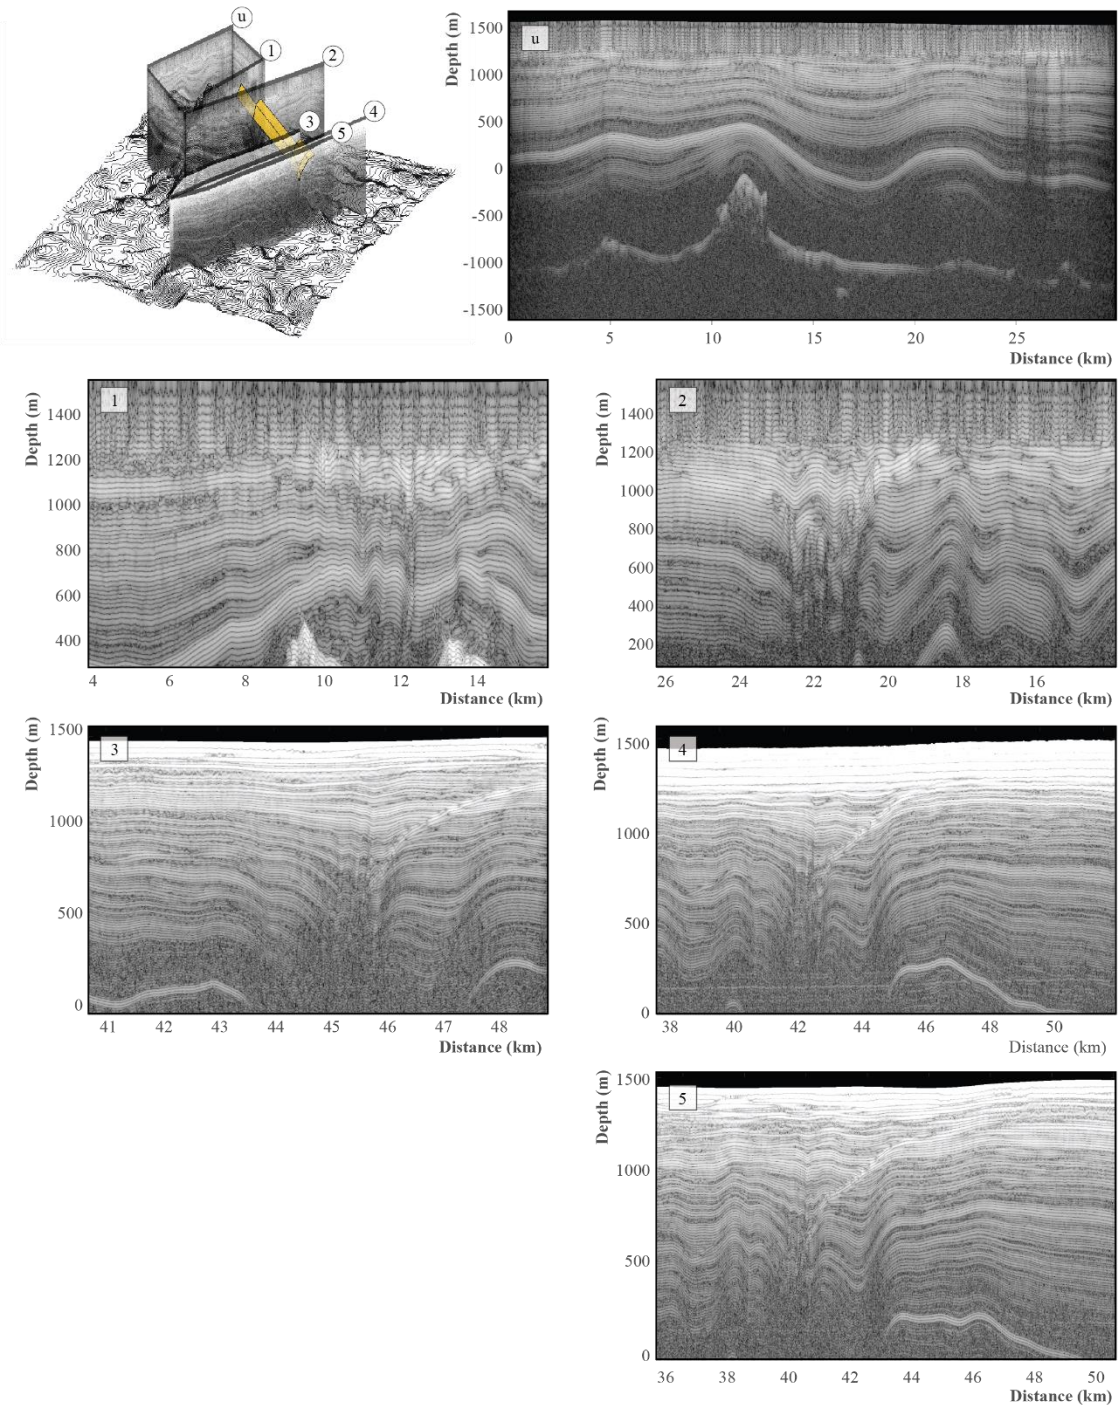

**Figure S1:** Radargrams capturing the evolution of the stratigraphic unconformity as it propagates downstream from Mt. Resnik. Panel (u) shows radar data immediately upstream of the subglacial volcano, showing no indication of an unconformity within the englacial layering. Panels (1-5) move progressively further downstream. Panel (1) shows the incipient structure and distorted layers that exist on the hanging wall side of the unconformity.
